# Supplementary material for: Elevated Serum Amino Acids Induce a Subpopulation of Alpha Cells to Initiate Pancreatic Neuroendocrine Tumor Formation
Source: PubMed Central journal article supplement — Cell Rep Med. 2020 Aug 25;1(5):100058. doi: 10.1016/j.xcrm.2020.100058 (PMC7659536; doi:10.1016/j.xcrm.2020.100058), 2020-08-25
Supplement: mmc1.pdf [file mmc1.pdf]

**Cell Reports Medicine, Volume 1**

**Supplemental Information**

**Elevated Serum Amino Acids Induce a Subpopulation  
of Alpha Cells to Initiate Pancreatic  
Neuroendocrine Tumor Formation**

**Derek K. Smith, Lance Kates, Steffen Durinck, Nisha Patel, Eric W. Stawiski, Noelyn Kljavin, Oded Foreman, Bence Sipos, Mark J. Solloway, Bernard B. Allan, and Andrew S. Peterson**

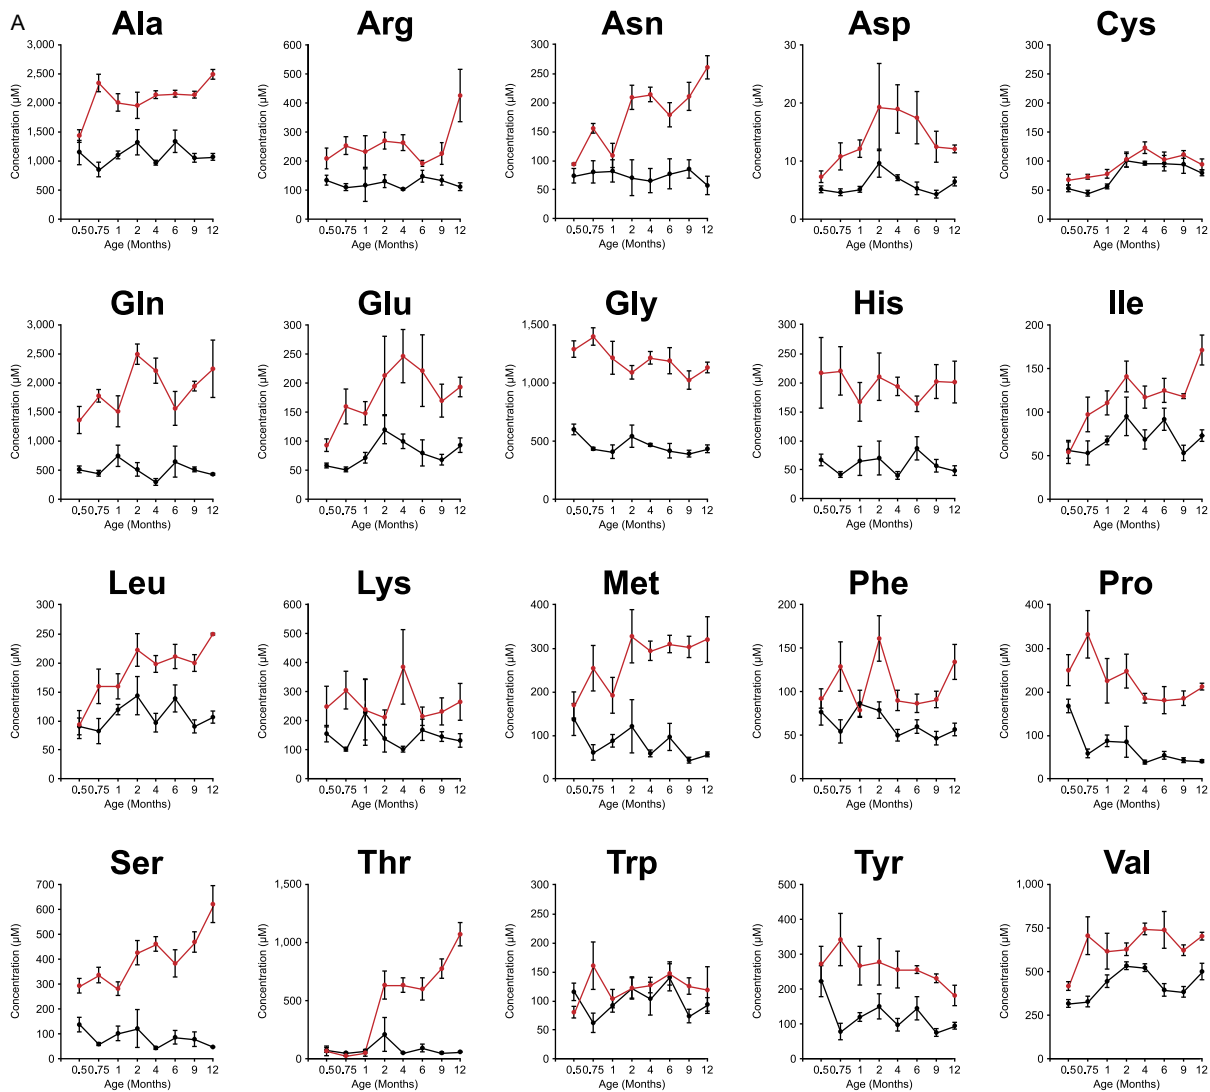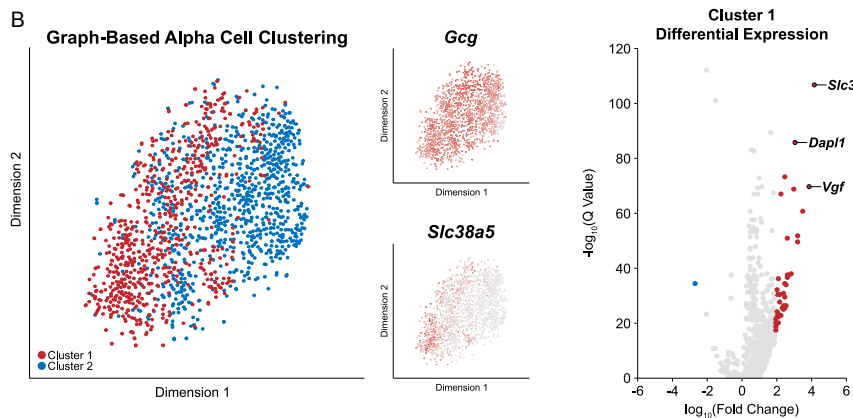

**Supplemental Figure 1. Individual plasma amino acid concentrations and graph-based clustering identifies alpha cell subpopulation in *Gcgr* knockout islets**

**Related to Figure 1.**

(A) Time-course analysis of individual blood amino acid concentrations in heterozygous and homozygous *Gcgr* knockout mice. SLC38A5 is a neutral amino acid transporter that primarily transports Ala, Asn, Gln, Gly, His, and Ser.

(B) tSNE visualization of graph-based alpha cell clustering from *Gcgr* homozygous knockout mice with alpha cell-specific *Gcg* and *Slc38a5* expression plots. Differential expression analysis was performed using two groups identified from graph-based clustering and this highlights the multiple genes that contribute to each cluster.

A

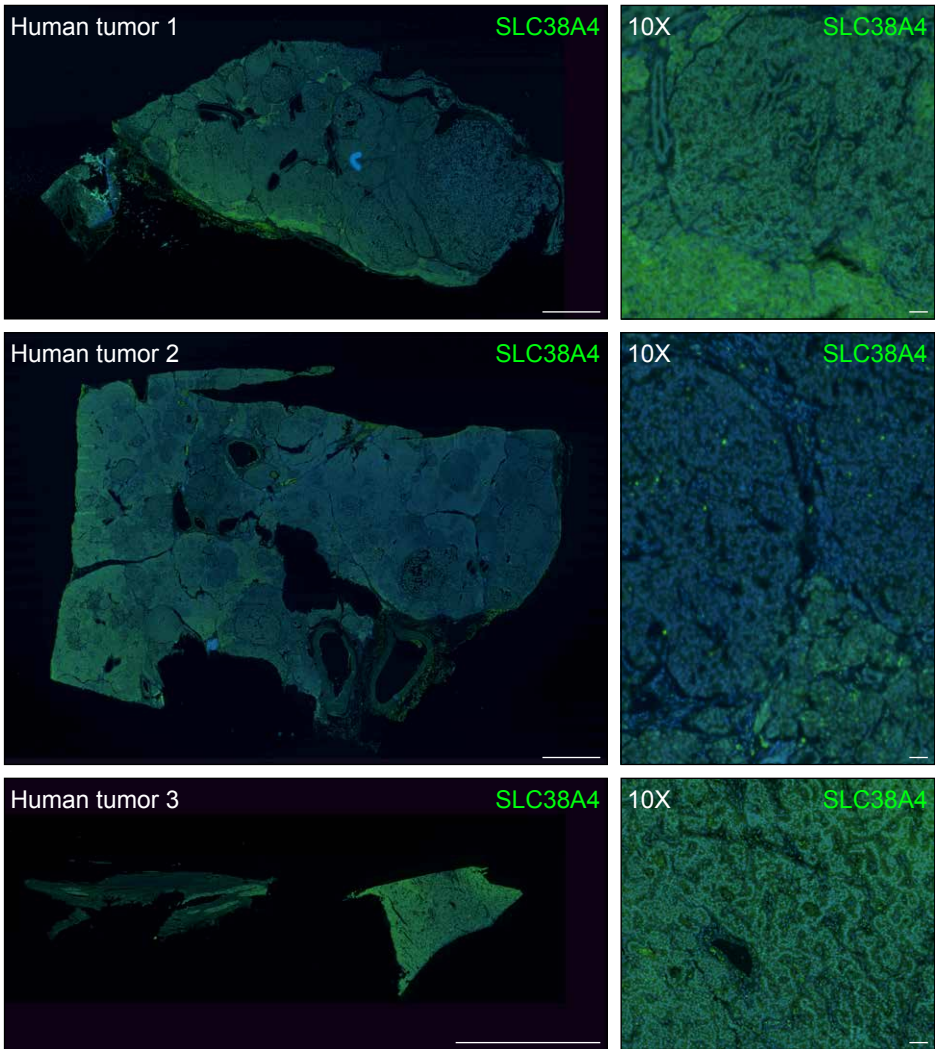

**Supplemental Figure 2. SLC38A4 expression in human tumor tissues.**

**Related to Figure 4.**

(A) Human tumor tissues stained for SLC38A4 immunofluorescence exhibit minimal signal-to-noise by whole slide scanning and confocal microscopy. Scale bar: 2.5 mm and 250  $\mu$ m
